# Supplementary material
Source: Springer Nature journal article supplement (https://www.springermedizin.de/resource/supplementary/12885_2013_5235_MOESM3_ESM.pdf/9466248)

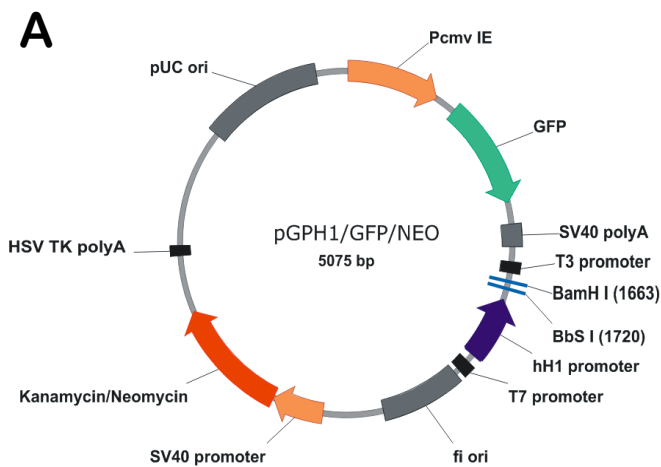

**B**

KIAA1199-ShA: 5'- CACC **GGTATTCAGCCGGATCCTTCAAGAGAGGATCCGGCTGAATACC** TTT TTT G -3'  
3'- **CCATAAGTCGGCTAGG** AAGTTCTCTCCTAGGCCGACTTATGGAAAAAACCTAG -5'

KIAA1199-ShB: 5'- CACC **GTTATGACCCACCCACATATCAAGAGTATGTGGGTGGGTGTCATAACTTT** TTTG -3'  
3'- **CAATACTGGGTGGGTGTAT** AGTTCTCATACCCACCCAGATTGAAAAAACCTAG -5'

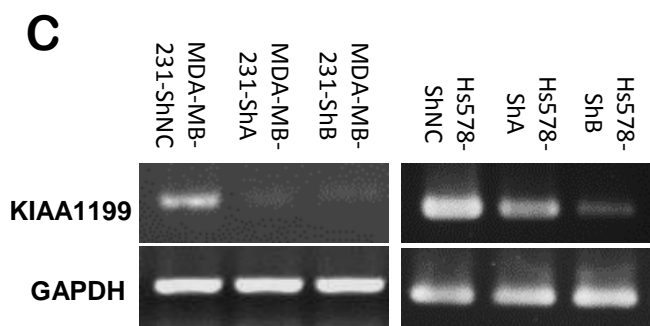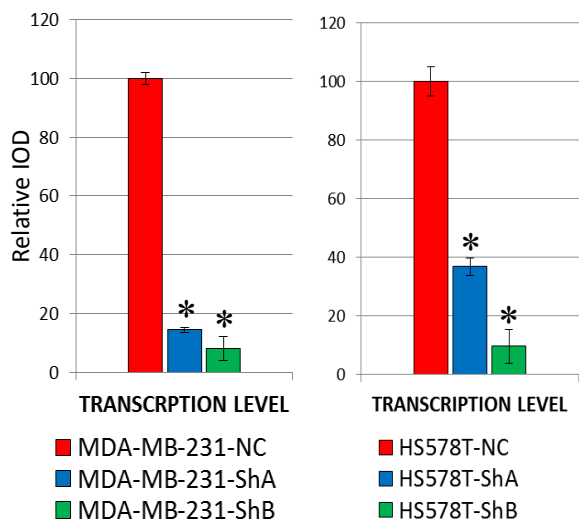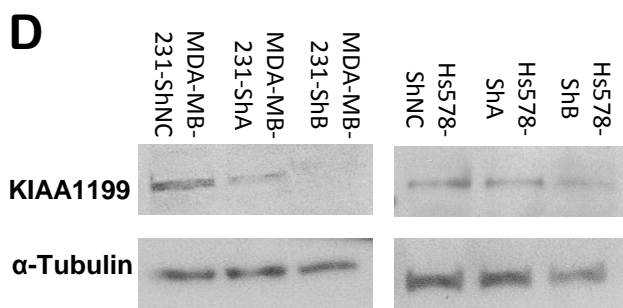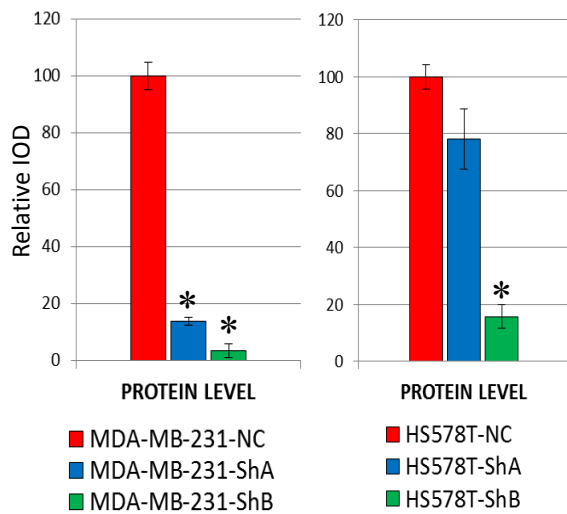

Supplement: MOESM3 [file 9466248]
